# Supplementary material for: Precise/small sample size determination of stable Cd isotope ratios of geological samples with double spike MC-ICP-MS
Source: Royal Society of Chemistry journal article supplement (doi:10.1039/d2ja00250g), 2022-01-01
Supplement: d2ja00250g1.pdf [file d2ja00250g1.pdf]

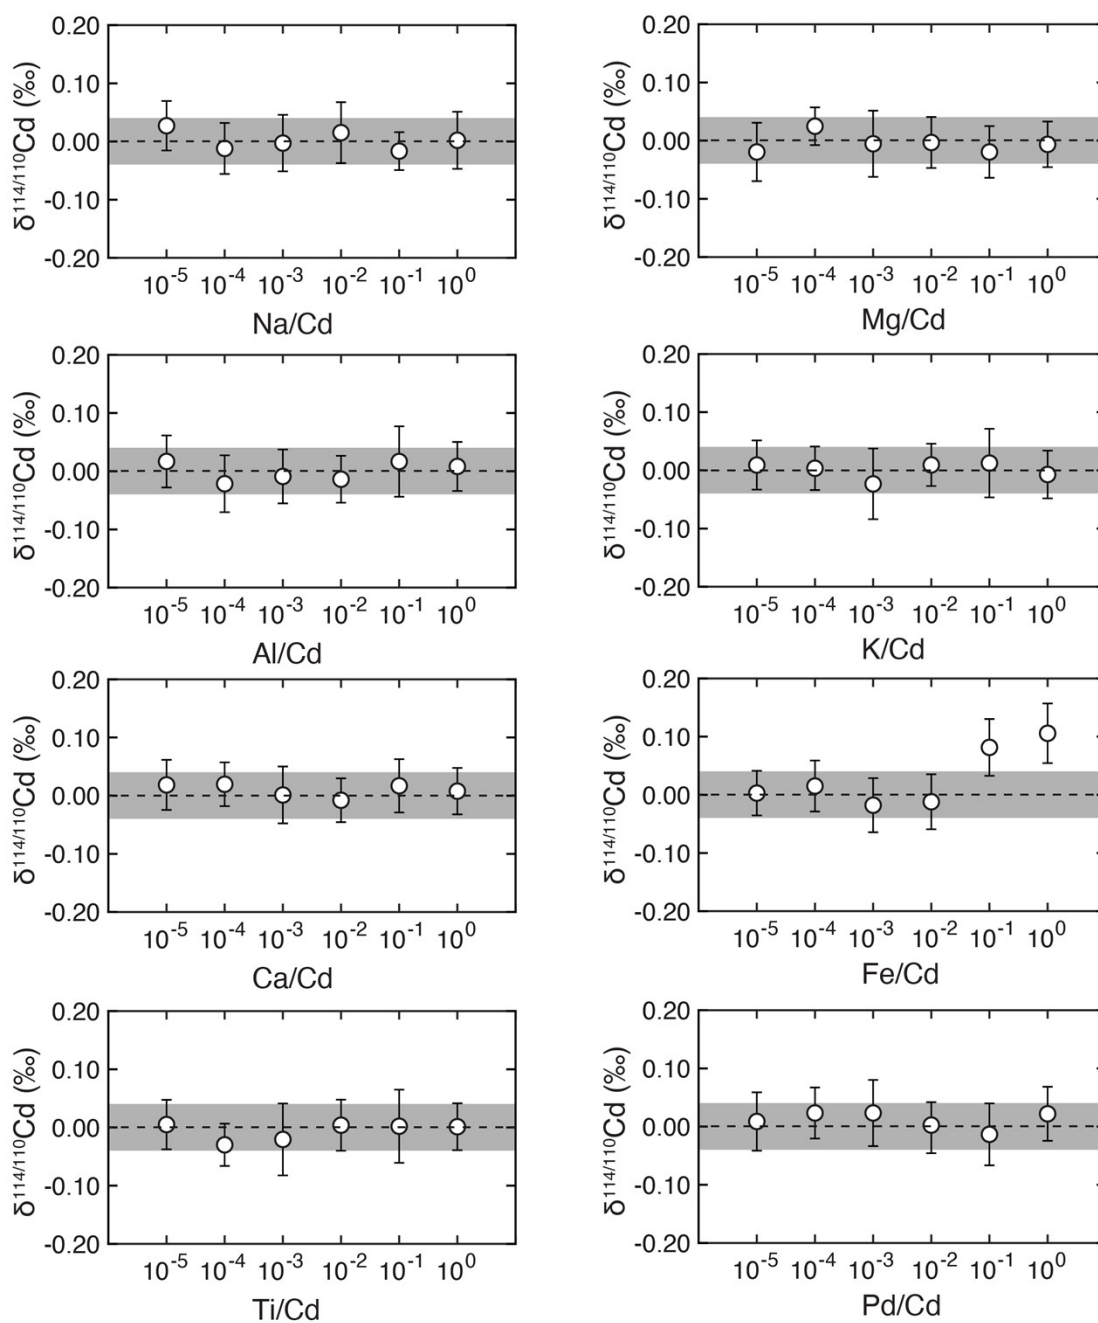

**Fig. S1.** Doping experiments for evaluating the influence of matrix elements on double spike Cd isotope measurements at a Cd concentration of  $40 \text{ ng g}^{-1}$ .

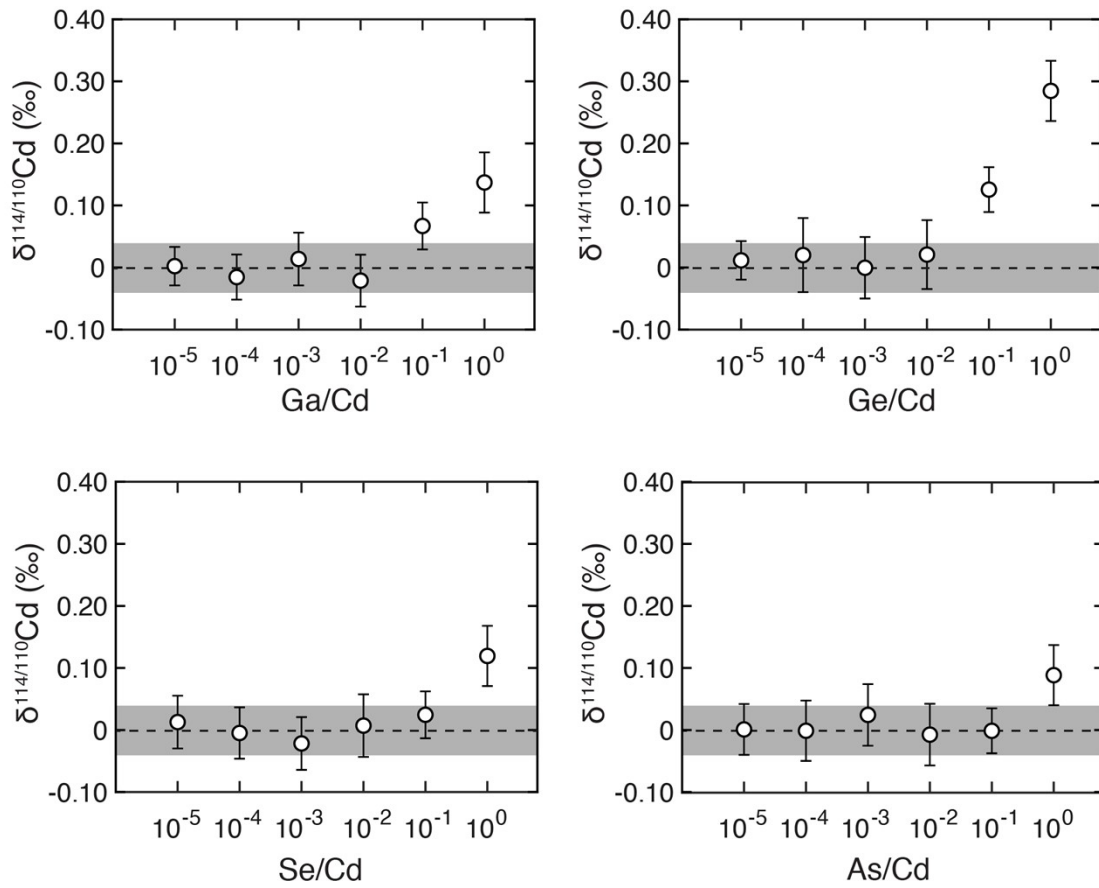

**Fig. S2.** Doping experiments for evaluating the influence of Ga, Ge, Se, and As on double spike Cd isotope measurements at a Cd concentration of  $40 \text{ ng g}^{-1}$ .

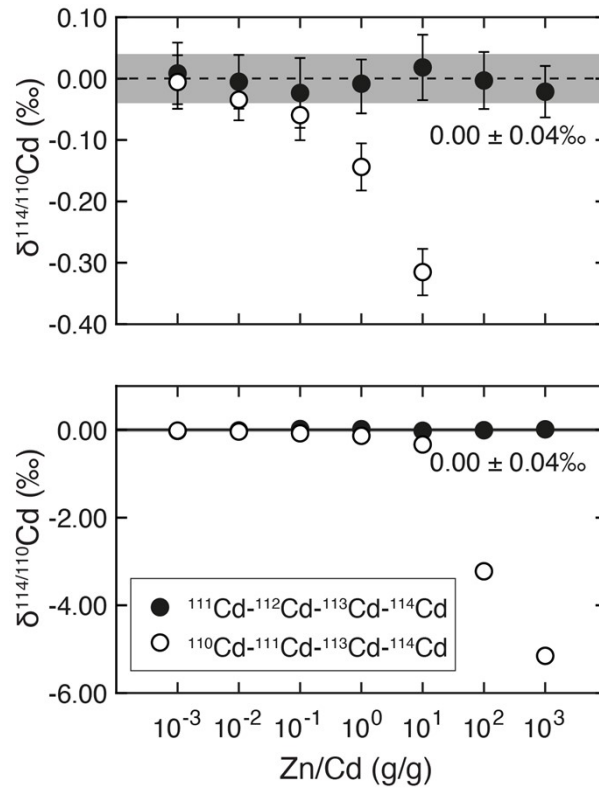

**Fig. S3.** Zn-doping experiments for evaluating the influence of Zn-argides on double spike Cd isotope measurements at a Cd concentration of  $20 \text{ ng g}^{-1}$ . The y-axis of the top panel is zoomed in to better display the data.
